# Supplementary material for: N-Methyl-phenacyloxycarbamidomethyl (Pocam) group: a novel thiol protecting group for solid-phase peptide synthesis and peptide condensation reactions
Source: Royal Society of Chemistry journal article supplement (doi:10.1039/c1ob05253e), 2011-01-01
Supplement: c1ob05253e.pdf [file c1ob05253e.pdf]

# ***N*-Methyl-phenacyloxycarbamidomethyl (Pocam) group: a novel thiol protecting group on the solid-phase peptide synthesis and the peptide condensation reactions**

Hidekazu Katayama, Yoshiaki Nakahara and Hironobu Hojo

## Supplementary Figures

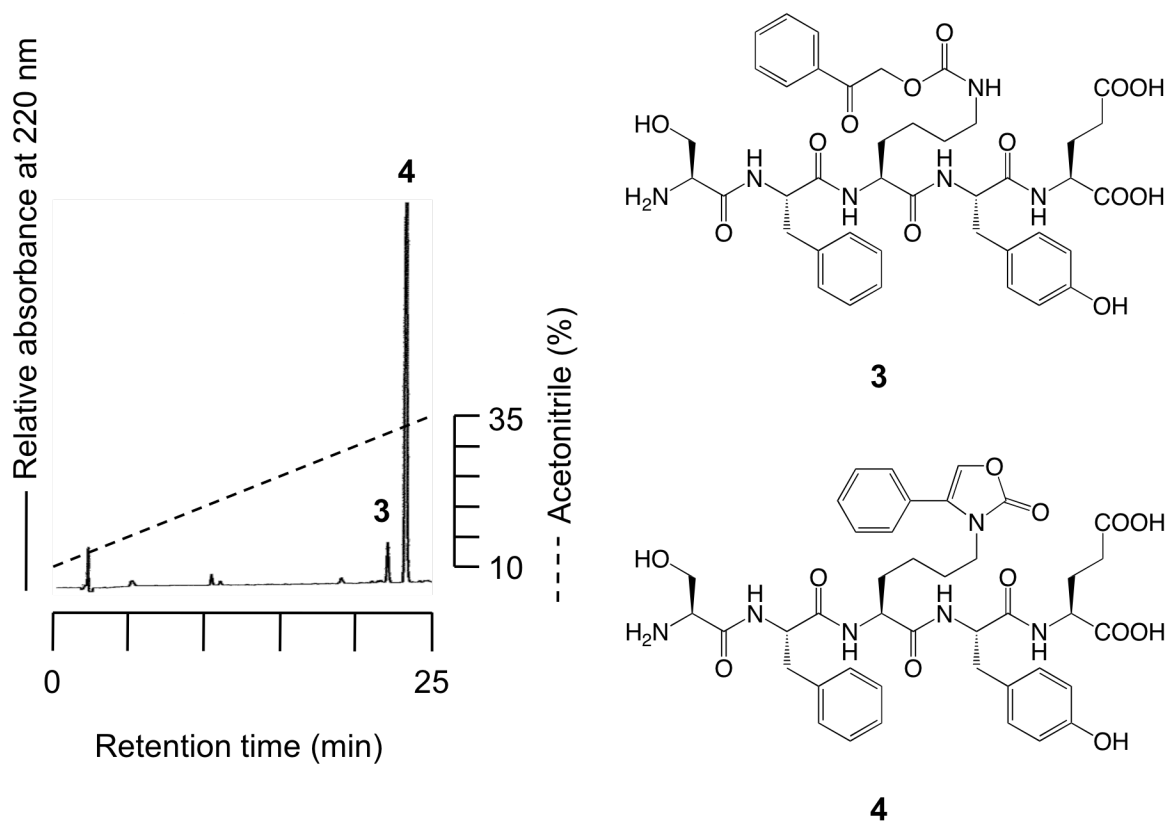

Supplementary Figure S1. RP-HPLC elution profile of crude peptides after the TFA cocktail treatment of H-Ser(Bu<sup>t</sup>)-Phe-Lys(Poc)-Tyr(Bu<sup>t</sup>)-Glu(OBu<sup>t</sup>)-OCH<sub>2</sub>-resin, and the chemical structures of peptides **3** and **4**.

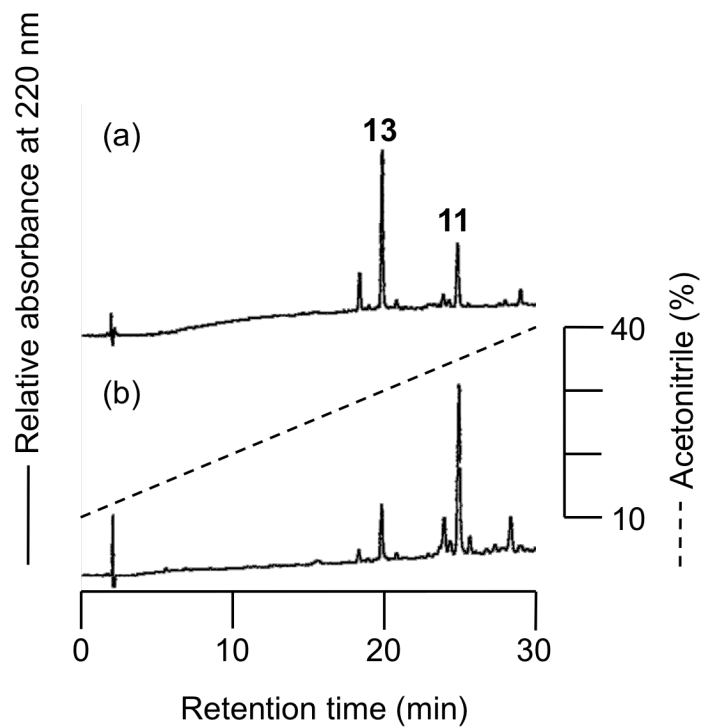

Supplementary Figure S2. RP-HPLC elution profiles of crude peptides after the TFA cocktail treatment. (a) TFA cocktail treatment at room temperature for 2 h. (b) TFA cocktail treatment at 4 °C for 4 h.

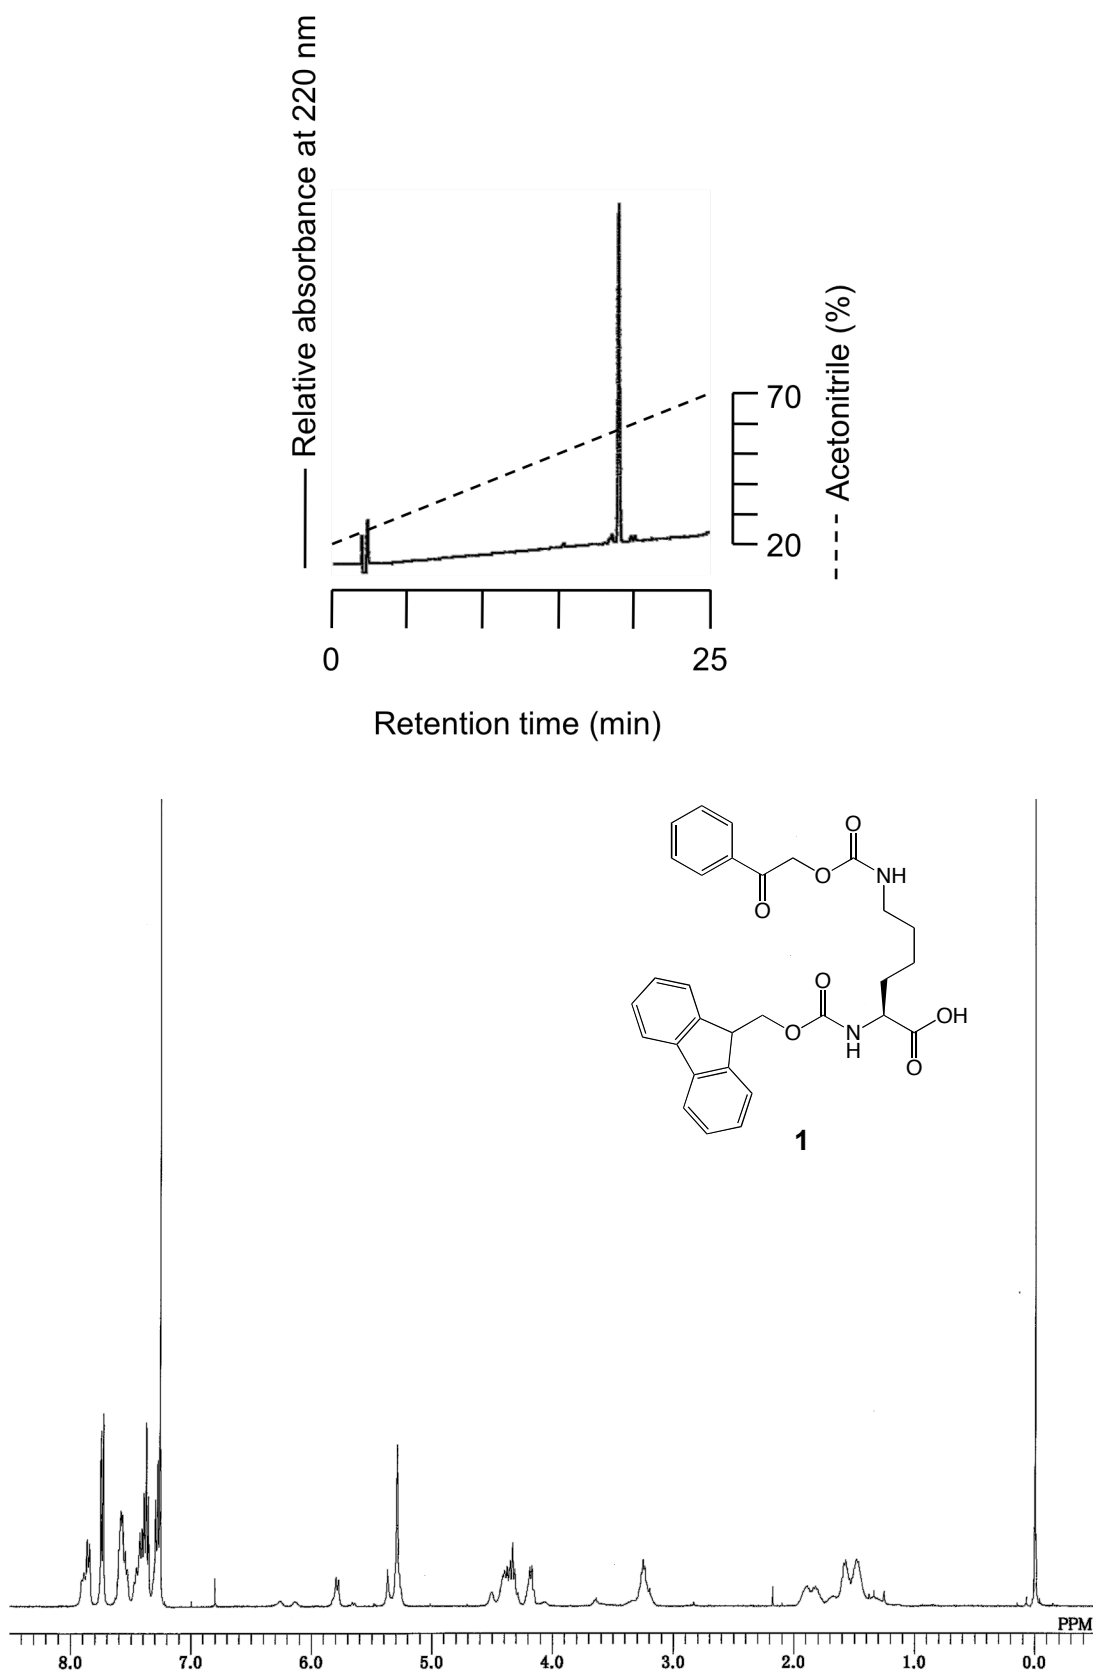

Supplementary Figure S3. RP-HPLC elution profile and <sup>1</sup>H-NMR spectrum of compound **1**.  
Column, Mightysil RP-18 (4.6φ x 150 mm); flow rate, 1 ml/ min.

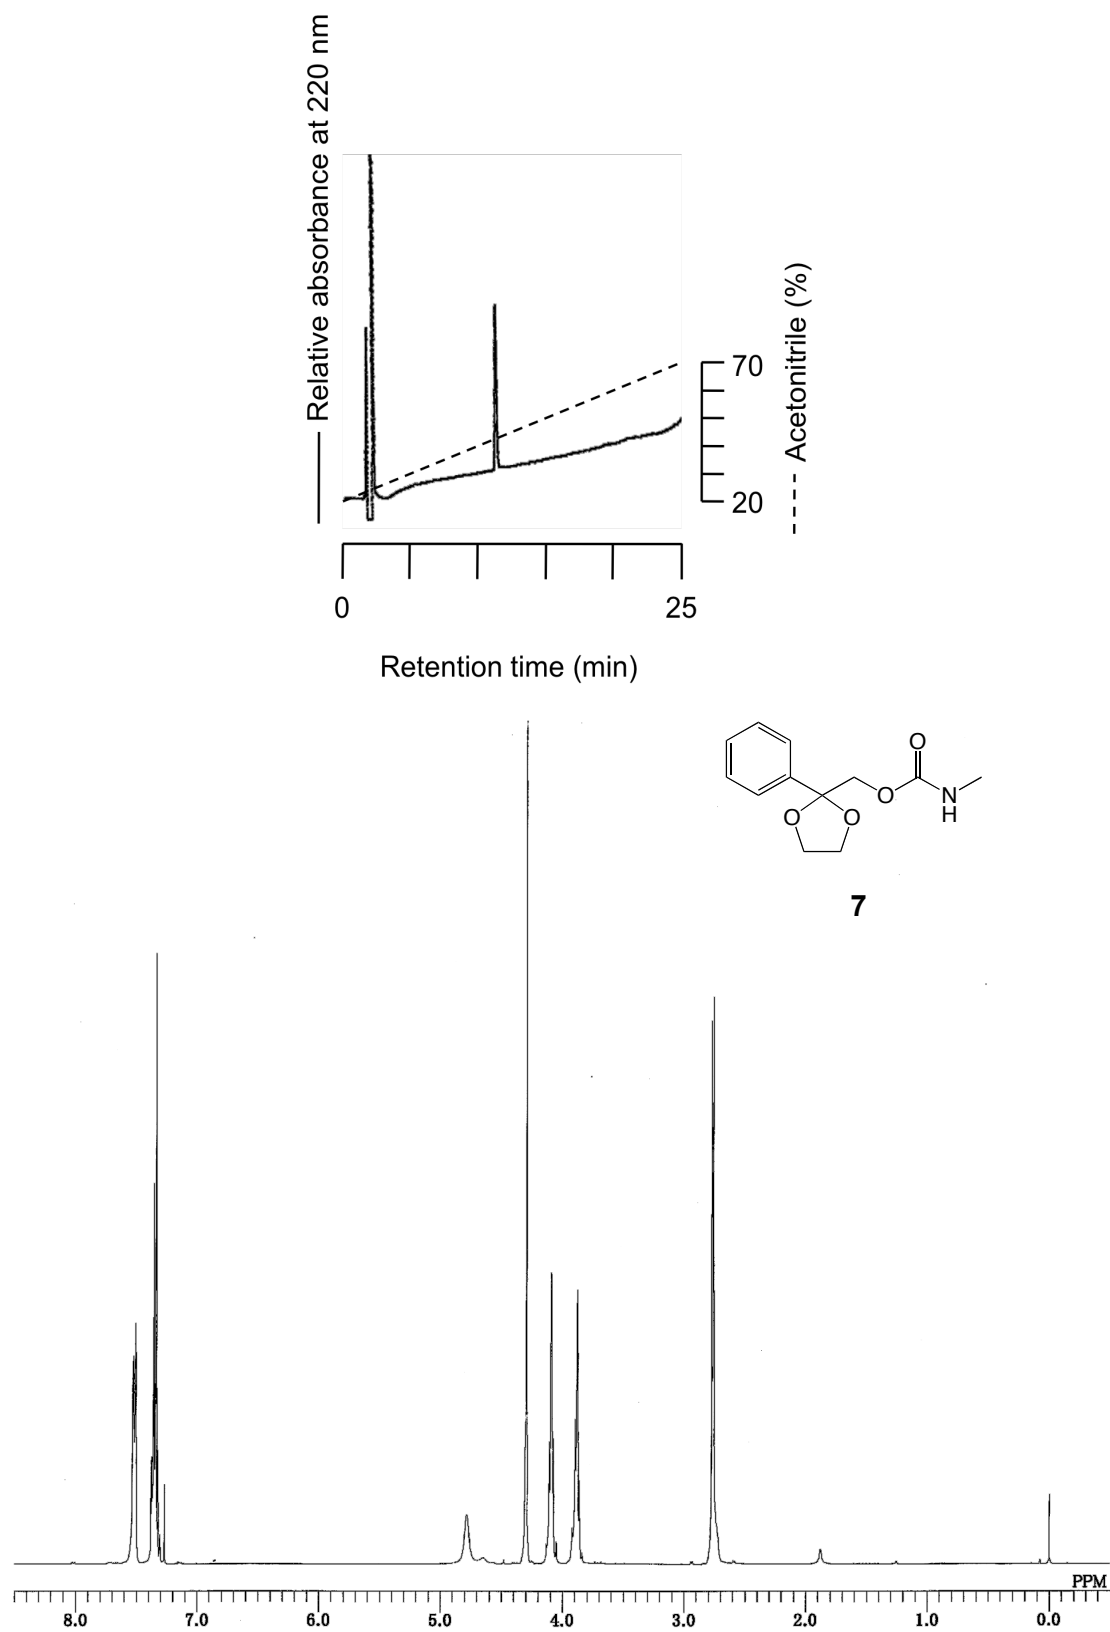

Supplementary Figure S4. RP-HPLC elution profile and <sup>1</sup>H-NMR spectrum of compound 7.  
Column, Mightysil RP-18 (4.6φ x 150 mm); flow rate, 1 ml/ min.

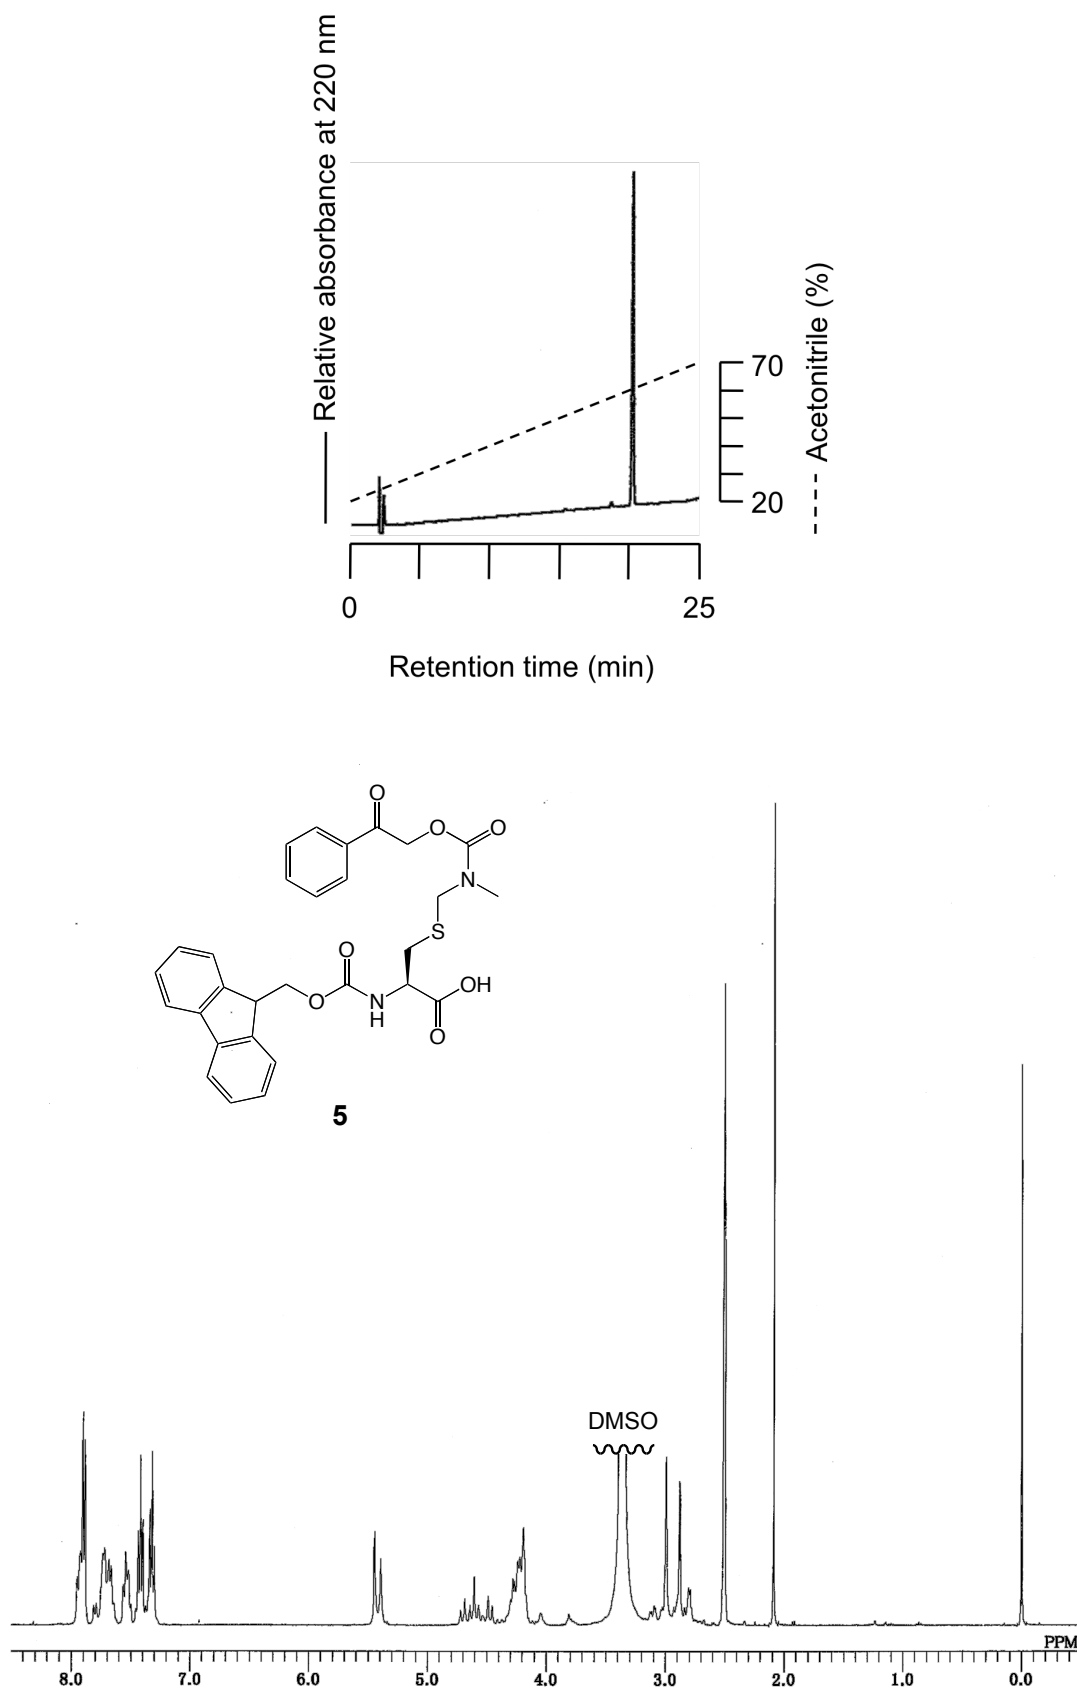

Supplementary Figure S5. RP-HPLC elution profile and <sup>1</sup>H-NMR spectrum of compound **5**.  
Column, Mightysil RP-18 (4.6φ x 150 mm); flow rate, 1 ml/ min.
